# Supplementary material for: Data Leakage and Loss in Biodiversity Informatics
Source: PubMed Central journal article supplement (PMC6235996; doi:10.3897/bdj.6.e26826), 2018-11-07
Supplement: bdj-06-e26826-s002.pdf [file bdj-06-e26826-s002.pdf]

## Appendix: Data Tables

Tables of data underlying figures 2 and 3. In each case, the primary biodiversity data held by the particular collection at the particular institution are separated into information that is absent (no information), partial, rescuable, or full, with respect to dimensions of time, taxonomic name, and place, as well as in terms of name x place jointly, and in terms of all three dimensions jointly.

### BIRDS

| MCZ                   | Time   | Place  | Name   | NamePlace | All 3  |
|-----------------------|--------|--------|--------|-----------|--------|
| No information        | 29543  | 1276   | 13     | 1288      | 29658  |
| Partial information   | 31     | 32916  | 305    | 33140     | 16821  |
| Rescuable information | 1      | 241698 | 7463   | 242070    | 231914 |
| Full information      | 288809 | 42494  | 310603 | 41886     | 39991  |

| AMNH                  | Time   | Place  | Name  | NamePlace | All 3  |
|-----------------------|--------|--------|-------|-----------|--------|
| No information        | 349    | 1127   | 0     | 1127      | 1431   |
| Partial information   | 69     | 4287   | 0     | 4287      | 4416   |
| Rescuable information | 0      | 125552 | 38981 | 125613    | 125200 |
| Full information      | 132582 | 2034   | 94019 | 1973      | 1953   |

| KSTC                  | Time | Place | Name | NamePlace | All 3 |
|-----------------------|------|-------|------|-----------|-------|
| No information        | 51   | 70    | 8    | 8         | 55    |
| Partial information   | 1    | 1700  | 14   | 81        | 63    |
| Rescuable information | 0    | 0     | 146  | 1681      | 1652  |
| Full information      | 1718 | 0     | 1602 | 0         | 0     |

| NCSM                  | Time  | Place | Name  | NamePlace | All 3 |
|-----------------------|-------|-------|-------|-----------|-------|
| No information        | 1293  | 407   | 0     | 407       | 1360  |
| Partial information   | 1192  | 1772  | 44    | 1804      | 2362  |
| Rescuable information | 0     | 18912 | 299   | 18880     | 17369 |
| Full information      | 18606 | 0     | 20748 | 0         | 0     |

| PSM                   | Time  | Place | Name  | NamePlace | All 3 |
|-----------------------|-------|-------|-------|-----------|-------|
| No information        | 245   | 181   | 1     | 182       | 338   |
| Partial information   | 466   | 246   | 2     | 248       | 646   |
| Rescuable information | 0     | 4617  | 1092  | 5472      | 5280  |
| Full information      | 24849 | 20516 | 24465 | 19658     | 19296 |

| KU                    | Time   | Name   | Place | NamePlace | All 3 |
|-----------------------|--------|--------|-------|-----------|-------|
| No information        | 9329   | 116    | 8312  | 8314      | 10508 |
| Partial information   | 1786   | 271    | 6     | 253       | 1797  |
| Rescuable information | 5      | 839    | 45582 | 45994     | 43284 |
| Full information      | 110919 | 120813 | 68139 | 67478     | 66450 |

## HERBARIA

| HARVARD               | Time   | Place  | Name   | NamePlace | All 3  |
|-----------------------|--------|--------|--------|-----------|--------|
| No information        | 185759 | 21433  | 7163   | 26681     | 191024 |
| Partial information   | 126936 | 45278  | 23498  | 60529     | 148382 |
| Rescuable information | 0      | 488199 | 0      | 467700    | 215504 |
| Full information      | 242215 | 0      | 524249 | 0         | 0      |

| GHANA                 | Time  | Place | Name  | NamePlace | All 3 |
|-----------------------|-------|-------|-------|-----------|-------|
| No information        | 3890  | 0     | 51    | 51        | 3931  |
| Partial information   | 8750  | 19679 | 1573  | 20807     | 25208 |
| Rescuable information | 5     | 58539 | 7202  | 57360     | 48979 |
| Full information      | 65573 | 0     | 69392 | 0         | 0     |

| CMN                   | Time   | Place  | Name   | NamePlace | All 3  |
|-----------------------|--------|--------|--------|-----------|--------|
| No information        | 2945   | 267    | 1076   | 1342      | 4195   |
| Partial information   | 3014   | 0      | 0      | 0         | 2940   |
| Rescuable information | 0      | 119136 | 2222   | 118061    | 112268 |
| Full information      | 113444 | 0      | 116105 | 0         | 0      |

| INPA                  | Time   | Place  | Name   | NamePlace | All 3  |
|-----------------------|--------|--------|--------|-----------|--------|
| No information        | 2899   | 7458   | 19952  | 26802     | 28792  |
| Partial information   | 8790   | 0      | 0      | 0         | 8056   |
| Rescuable information | 0      | 244283 | 40482  | 224939    | 214893 |
| Full information      | 240052 | 0      | 191307 | 0         | 0      |

| MPEG                  | Time   | Place  | Name   | NamePlace | All 3  |
|-----------------------|--------|--------|--------|-----------|--------|
| No information        | 4839   | 52     | 5989   | 6028      | 10620  |
| Partial information   | 8630   | 0      | 0      | 0         | 8418   |
| Rescuable information | 0      | 155088 | 32432  | 149112    | 136102 |
| Full information      | 141671 | 0      | 116719 | 0         | 0      |

| MSC                   | Time  | Place | Name  | NamePlace | All 3 |
|-----------------------|-------|-------|-------|-----------|-------|
| No information        | 1183  | 212   | 616   | 746       | 1770  |
| Partial information   | 4380  | 0     | 0     | 0         | 4304  |
| Rescuable information | 0     | 65114 | 2457  | 64580     | 59252 |
| Full information      | 59763 | 0     | 62253 | 0         | 0     |

| UA                    | Time  | Place | Name  | NamePlace | All 3 |
|-----------------------|-------|-------|-------|-----------|-------|
| No information        | 1615  | 200   | 55    | 255       | 1792  |
| Partial information   | 1330  | 0     | 0     | 0         | 1275  |
| Rescuable information | 0     | 41260 | 508   | 41205     | 38393 |
| Full information      | 38515 | 0     | 40897 | 0         | 0     |

| USF                   | Time   | Place  | Name   | NamePlace | All 3  |
|-----------------------|--------|--------|--------|-----------|--------|
| No information        | 1048   | 7844   | 138    | 7970      | 8865   |
| Partial information   | 4667   | 0      | 0      | 0         | 4184   |
| Rescuable information | 0      | 132737 | 1163   | 132611    | 127532 |
| Full information      | 134866 | 0      | 139280 | 0         | 0      |
